# Supplementary material for: Simultaneous determination of acid-soluble biomass-derived compounds using high performance anion exchange chromatography coupled with pulsed amperometric detection
Source: Royal Society of Chemistry journal article supplement (doi:10.1039/c5ay01371b), 2015-01-01
Supplement: c5ay01371b1.pdf [file c5ay01371b1.pdf]

## Simultaneous determination of acid-soluble biomass-derived compounds using high performance anion exchange chromatography coupled with pulsed amperometric detection

N. Anders<sup>a\*</sup>, H. Humann<sup>a</sup>, B. Langhans<sup>a</sup>, A. C. Spieß<sup>a,b</sup>

<sup>a</sup> AVT-Enzyme Process Technology, RWTH Aachen University, Worringer Weg 1, 52074 Aachen, Germany

<sup>b</sup> DWI – Leibniz Institute for Interactive Materials, Forckenbeckstraße 50, 52074 Aachen, Germany

### Table of content:

**Table S-1:** HPAEC-PAD results for each measured carbohydrate and each biomass in g/L including molecular formula. The results were obtained after a two-step acid hydrolysis according to NREL/TP-510-42618 procedure.<sup>1</sup> The hydrolysis led to liquid solutions which were diluted tenfold and measured with the method described in HPAEC-PAD instrumentation, software and method.

**Table S-2:** HPAEC-PAD results for each measured uronic acid, sugar degradation product as well as the lignin model compound and each biomass in g/L including molecular formula. The results were obtained after a two-step acid hydrolysis according to NREL/TP-510-42618 procedure.<sup>1</sup> The hydrolysis led to liquid solutions which were diluted tenfold and measured with the method described in HPAEC-PAD instrumentation, software and method.

**Table S-3:** Precision of the HPAEC-PAD method. Based on a tenfold measurement of melon peel hydrolyzate, the standard deviation and the relative standard deviation were estimated. n.d. = not detectable, n.q. = not quantifiable.

**Figure S-1:** Superposition of chromatograms of commercially available soluble biomass standards. These chromatograms show the separation of all compound classes, alcoholic acid soluble lignin compounds, sugar degradation product, monosaccharides, oligosaccharides, uronic acids and phenolic acid soluble lignin compounds.

**Figure S-2:** Overlay of chromatograms from different hydrolyzates. Diverse biomasses were hydrolyzed with a two-step acid hydrolysis. The obtained liquid was analyzed using the HPAEC-PAD method described here. A and C: full chromatogram. B and D: chromatograms of the biomass derived phenols.

**References:**

(1) Sluiter A., Hamas B., Ruiz R., Scarlata C., Sluiter J., Templeton D. and Crocker D.: Determination of structural carbohydrates and lignin in biomass, Laboratory Analytical Procedures (LAP), Technical Report NREL/TP-510-42618, 2008

**Table S-1: HPAEC-PAD results for each measured carbohydrate and each biomass in g/L including molecular formula. n.d. = not determinable**

|                        | 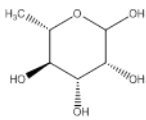 |  |  |  |  |  |  |  |  |  |  |  |  |
|------------------------|-----------------------------------------------------------------------------------|-----------------------------------------------------------------------------------|-----------------------------------------------------------------------------------|-----------------------------------------------------------------------------------|-----------------------------------------------------------------------------------|-------------------------------------------------------------------------------------|-------------------------------------------------------------------------------------|-------------------------------------------------------------------------------------|-------------------------------------------------------------------------------------|-------------------------------------------------------------------------------------|-------------------------------------------------------------------------------------|-------------------------------------------------------------------------------------|-------------------------------------------------------------------------------------|
|                        | Rhamnose                                                                          | Arabinose                                                                         | Galactose                                                                         | Glucose                                                                           | Mannose                                                                           | Xylose                                                                              | Fructose                                                                            | Sucrose                                                                             | Cellobiose                                                                          | Cellotriose                                                                         | Cellotetraose                                                                       | Cellopentaose                                                                       | Cellohexaose                                                                        |
| Avicel                 | n.d.                                                                              | n.d.                                                                              | n.d.                                                                              | 2.570                                                                             | 0.060                                                                             | 0.054                                                                               | n.d.                                                                                | n.d.                                                                                | 0.034                                                                               | n.d.                                                                                | n.d.                                                                                | n.d.                                                                                | n.d.                                                                                |
| Banana peel            | n.d.                                                                              | 0.093                                                                             | 0.055                                                                             | 0.416                                                                             | 0.063                                                                             | 0.064                                                                               | 0.015                                                                               | n.d.                                                                                | 0.008                                                                               | 0.003                                                                               | n.d.                                                                                | n.d.                                                                                | n.d.                                                                                |
| Barley awn             | n.d.                                                                              | 0.099                                                                             | n.d.                                                                              | 0.900                                                                             | n.d.                                                                              | 0.598                                                                               | n.d.                                                                                |
| Barley straw           | n.d.                                                                              | 0.080                                                                             | n.d.                                                                              | 0.958                                                                             | n.d.                                                                              | 0.461                                                                               | n.d.                                                                                | n.d.                                                                                | 0.001                                                                               | n.d.                                                                                | n.d.                                                                                | n.d.                                                                                | n.d.                                                                                |
| Coconut peel           | 0.007                                                                             | 0.016                                                                             | n.d.                                                                              | 0.300                                                                             | n.d.                                                                              | n.d.                                                                                | n.d.                                                                                | n.d.                                                                                | 0.001                                                                               | 0.001                                                                               | n.d.                                                                                | n.d.                                                                                | 0.003                                                                               |
| Honey dew melon peel   | 0.017                                                                             | 0.052                                                                             | 0.082                                                                             | 0.243                                                                             | 0.008                                                                             | 0.024                                                                               | 0.013                                                                               | n.d.                                                                                | 0.001                                                                               | 0.001                                                                               | n.d.                                                                                | 0.001                                                                               | n.d.                                                                                |
| Lawn grass             | n.d.                                                                              | 0.117                                                                             | 0.061                                                                             | 0.658                                                                             | n.d.                                                                              | 0.302                                                                               | n.d.                                                                                | n.d.                                                                                | 0.014                                                                               | 0.003                                                                               | n.d.                                                                                | n.d.                                                                                | n.d.                                                                                |
| Lignin, alkali         | n.d.                                                                              | n.d.                                                                              | 0.015                                                                             | n.d.                                                                              | n.d.                                                                              | 0.088                                                                               | n.d.                                                                                | n.d.                                                                                | 0.001                                                                               | n.d.                                                                                | n.d.                                                                                | n.d.                                                                                | n.d.                                                                                |
| Lime peel              | 0.014                                                                             | 0.316                                                                             | 0.098                                                                             | 0.441                                                                             | 0.056                                                                             | 0.058                                                                               | n.d.                                                                                | n.d.                                                                                | 0.003                                                                               | 0.002                                                                               | n.d.                                                                                | n.d.                                                                                | n.d.                                                                                |
| News paper             | n.d.                                                                              | 0.010                                                                             | n.d.                                                                              | 1.588                                                                             | 0.212                                                                             | 0.192                                                                               | n.d.                                                                                | n.d.                                                                                | 0.003                                                                               | n.d.                                                                                | n.d.                                                                                | n.d.                                                                                | n.d.                                                                                |
| orange peel            | 0.039                                                                             | 0.384                                                                             | 0.242                                                                             | 0.290                                                                             | 0.100                                                                             | 0.067                                                                               | 0.031                                                                               | n.d.                                                                                | 0.015                                                                               | 0.001                                                                               | n.d.                                                                                | 0.002                                                                               | 0.001                                                                               |
| Organocat spruce wood  | 0.003                                                                             | 0.067                                                                             | 0.061                                                                             | 0.440                                                                             | 0.595                                                                             | 0.179                                                                               | n.d.                                                                                | n.d.                                                                                | 0.003                                                                               | 0.001                                                                               | n.d.                                                                                | 0.001                                                                               | n.d.                                                                                |
| Organosolv spruce wood | n.d.                                                                              | n.d.                                                                              | n.d.                                                                              | 0.407                                                                             | 0.013                                                                             | 0.048                                                                               | n.d.                                                                                | n.d.                                                                                | 0.001                                                                               | 0.001                                                                               | 0.002                                                                               | n.d.                                                                                | n.d.                                                                                |
| Pectin                 | 0.052                                                                             | 0.034                                                                             | 0.247                                                                             | 0.230                                                                             | n.d.                                                                              | 0.006                                                                               | n.d.                                                                                | n.d.                                                                                | 0.025                                                                               | 0.001                                                                               | n.d.                                                                                | n.d.                                                                                | n.d.                                                                                |
| Spruce wood            | n.d.                                                                              | 0.026                                                                             | 0.066                                                                             | 0.998                                                                             | 0.309                                                                             | 0.115                                                                               | n.d.                                                                                | n.d.                                                                                | 0.027                                                                               | 0.004                                                                               | n.d.                                                                                | n.d.                                                                                | n.d.                                                                                |
| Water melon peel       | 0.006                                                                             | 0.019                                                                             | 0.072                                                                             | 0.184                                                                             | 0.031                                                                             | 0.070                                                                               | 0.014                                                                               | n.d.                                                                                | n.d.                                                                                | n.d.                                                                                | n.d.                                                                                | n.d.                                                                                | n.d.                                                                                |
| Xylan                  | 0.002                                                                             | 0.004                                                                             | 0.025                                                                             | 0.024                                                                             | n.d.                                                                              | 1.116                                                                               | n.d.                                                                                |

**Table S-2: HPAEC-PAD results for each measured uronic acid, sugar degradation product as well as the lignin model compound and each biomass in g/L including molecular formula. n. s. = not specified, n.d. = not determinable.**

|                        | Galacturonic acid                                                                 | Glucuronic acid                                                                   | 5-HMF                                                                             | 2,3-dimethoxy-benzyl alcohol                                                      | 3,4-dimethoxy-benzyl alcohol                                                       | 4-methoxy-benzyl alcohol                                                            | 3,4-dimethoxy-benzaldehyde                                                          | 2,6-dimethoxy-phenol                                                                | 2-methoxy-phenol                                                                    | 4-allyl-2-methoxy-phenol                                                            | 3,5-dimethoxy-4-hydroxy-benzaldehyde                                                | LMC                                                                                 | AIL   |
|------------------------|-----------------------------------------------------------------------------------|-----------------------------------------------------------------------------------|-----------------------------------------------------------------------------------|-----------------------------------------------------------------------------------|------------------------------------------------------------------------------------|-------------------------------------------------------------------------------------|-------------------------------------------------------------------------------------|-------------------------------------------------------------------------------------|-------------------------------------------------------------------------------------|-------------------------------------------------------------------------------------|-------------------------------------------------------------------------------------|-------------------------------------------------------------------------------------|-------|
|                        | 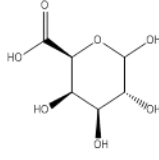 |  |  |  |  |  |  |  |  |  |  |  | n.s.  |
| Avicel                 | n.d.                                                                              | n.d.                                                                              | 0.043                                                                             | 0.054                                                                             | n.d.                                                                               | n.d.                                                                                | n.d.                                                                                | n.d.                                                                                | n.d.                                                                                | n.d.                                                                                | n.d.                                                                                | n.d.                                                                                | 0.015 |
| Banana peel            | 0.014                                                                             | 0.008                                                                             | 0.042                                                                             | 0.041                                                                             | n.d.                                                                               | n.d.                                                                                | n.d.                                                                                | n.d.                                                                                | 0.085                                                                               | n.d.                                                                                | n.d.                                                                                | n.d.                                                                                | 0.866 |
| Barley awn             | n.d.                                                                              | n.d.                                                                              | 0.035                                                                             | 0.046                                                                             | n.d.                                                                               | n.d.                                                                                | n.d.                                                                                | n.d.                                                                                | 0.119                                                                               | n.d.                                                                                | n.d.                                                                                | n.d.                                                                                | 0.756 |
| Barley straw           | n.d.                                                                              | n.d.                                                                              | 0.035                                                                             | 0.046                                                                             | n.d.                                                                               | n.d.                                                                                | n.d.                                                                                | n.d.                                                                                | 0.083                                                                               | n.d.                                                                                | n.d.                                                                                | n.d.                                                                                | 0.827 |
| Coconut peel           | 0.024                                                                             | 0.002                                                                             | n.d.                                                                              | 0.008                                                                             | n.d.                                                                               | n.d.                                                                                | n.d.                                                                                | n.d.                                                                                | n.d.                                                                                | 0.023                                                                               | 0.009                                                                               | n.d.                                                                                | 1.839 |
| Honey dew melon peel   | 0.104                                                                             | 0.006                                                                             | n.d.                                                                              | 0.023                                                                             | 0.019                                                                              | n.d.                                                                                | 0.022                                                                               | n.d.                                                                                | n.d.                                                                                | 0.024                                                                               | 0.002                                                                               | n.d.                                                                                | n.d.  |
| Lawn grass             | 0.104                                                                             | 0.008                                                                             | 0.040                                                                             | 0.043                                                                             | n.d.                                                                               | n.d.                                                                                | n.d.                                                                                | n.d.                                                                                | 0.092                                                                               | n.d.                                                                                | n.d.                                                                                | n.d.                                                                                | 0.699 |
| Lignin, alkali         | n.d.                                                                              | n.d.                                                                              | 0.031                                                                             | n.d.                                                                              | n.d.                                                                               | n.d.                                                                                | n.d.                                                                                | n.d.                                                                                | n.d.                                                                                | n.d.                                                                                | n.d.                                                                                | n.d.                                                                                | 2.040 |
| Lime peel              | 0.381                                                                             | 0.005                                                                             | 0.038                                                                             | 0.044                                                                             | 0.003                                                                              | n.d.                                                                                | n.d.                                                                                | n.d.                                                                                | 0.097                                                                               | 0.016                                                                               | 0.001                                                                               | n.d.                                                                                | 0.272 |
| News paper             | n.d.                                                                              | n.d.                                                                              | 0.037                                                                             | 0.048                                                                             | n.d.                                                                               | n.d.                                                                                | 0.023                                                                               | n.d.                                                                                | n.d.                                                                                | n.d.                                                                                | n.d.                                                                                | n.d.                                                                                | 0.631 |
| orange peel            | 0.657                                                                             | 0.004                                                                             | n.d.                                                                              | 0.009                                                                             | n.d.                                                                               | n.d.                                                                                | n.d.                                                                                | n.d.                                                                                | n.d.                                                                                | 0.017                                                                               | n.d.                                                                                | n.d.                                                                                | 0.237 |
| Organo cat spruce wood | n.d.                                                                              | 0.004                                                                             | n.d.                                                                              | 0.011                                                                             | 0.007                                                                              | n.d.                                                                                | 0.026                                                                               | n.d.                                                                                | n.d.                                                                                | 0.064                                                                               | 0.002                                                                               | n.d.                                                                                | 1.154 |
| Organosolv spruce wood | n.d.                                                                              | n.d.                                                                              | n.d.                                                                              | 0.011                                                                             | 0.036                                                                              | n.d.                                                                                | n.d.                                                                                | n.d.                                                                                | n.d.                                                                                | 0.006                                                                               | 0.001                                                                               | n.d.                                                                                | 1.075 |
| Pectin                 | 1.619                                                                             | 0.007                                                                             | n.d.                                                                              | 0.004                                                                             | 0.038                                                                              | n.d.                                                                                | n.d.                                                                                | n.d.                                                                                | 0.006                                                                               | 0.035                                                                               | 0.001                                                                               | n.d.                                                                                | n.d.  |
| Spruce wood            | n.d.                                                                              | 0.004                                                                             | 0.035                                                                             | 0.045                                                                             | n.d.                                                                               | n.d.                                                                                | 0.031                                                                               | n.d.                                                                                | n.d.                                                                                | n.d.                                                                                | n.d.                                                                                | n.d.                                                                                | 0.955 |
| Water melon            | 0.010                                                                             | n.d.                                                                              | 0.017                                                                             | 0.005                                                                             | n.d.                                                                               | n.d.                                                                                | n.d.                                                                                | n.d.                                                                                | n.d.                                                                                | 0.000                                                                               | 0.000                                                                               | n.d.                                                                                | 0.495 |
| xylan                  | n.d.                                                                              | n.d.                                                                              | 0.031                                                                             | 0.039                                                                             | n.d.                                                                               | n.d.                                                                                | n.d.                                                                                | n.d.                                                                                | 0.172                                                                               | n.d.                                                                                | n.d.                                                                                | n.d.                                                                                | 0.115 |

**Tab. S-3: Precision of the HPAEC-PAD method.** Based on a tenfold measurement of water melon peel hydrolyzate, the standard deviation and the relative standard deviation were estimated. n.d. = not detectable, n.q. = not quantifiable.

| <b>Compound</b>                     | <b>standard</b> |                  | <b>RSD</b> |
|-------------------------------------|-----------------|------------------|------------|
|                                     | <b>average</b>  | <b>deviation</b> |            |
|                                     | <b>[mg/L]</b>   | <b>[mg/L]</b>    | <b>[%]</b> |
| Rhamnose                            | 5.08            | 0.18             | 3.54       |
| Arabinose                           | 19.25           | 0.20             | 1.03       |
| Galactose                           | 71.68           | 0.61             | 0.85       |
| Glucose                             | 184.46          | 1.65             | 0.89       |
| Mannose                             | 31.12           | 1.26             | 4.04       |
| Xylose                              | 69.76           | 1.44             | 2.06       |
| Fructose                            | 14.10           | 0.09             | 0.63       |
| Sucrose                             | n.d.            |                  |            |
| Cellobiose                          | n.q.            |                  |            |
| Cellotriose                         | n.q.            |                  |            |
| Cellotetraose                       | n.q.            |                  |            |
| Cellopentose                        | n.q.            |                  |            |
| Cellohexaose                        | n.q.            |                  |            |
| Galacturonic acid                   | 10.37           | 0.23             | 2.22       |
| Glucuronic acid                     | n.q.            |                  |            |
| 5-HMF                               | 17.30           | 0.18             | 1.04       |
| 2,3-dimethoxybenzyl alcohol         | 5.53            | 0.069            | 1.25       |
| 3,4-dimethoxybenzyl alcohol         | n.q.            |                  |            |
| 4-methoxybenzyl alcohol             | n.q.            |                  |            |
| 3,4-dimethoxybenzaldehyde           | n.q.            |                  |            |
| Lignin model compound               | n.d.            |                  |            |
| 2,6-dimethoxyphenol                 | n.q.            |                  |            |
| 2-methoxyphenol                     | n.q.            |                  |            |
| 4-allyl-2-methoxyphenol             | 0.28            | 0.06             | 21.43      |
| 3,5-dimethoxy-4-hydroxybenzaldehyde | 0.15            | 0.00             | 0.02       |

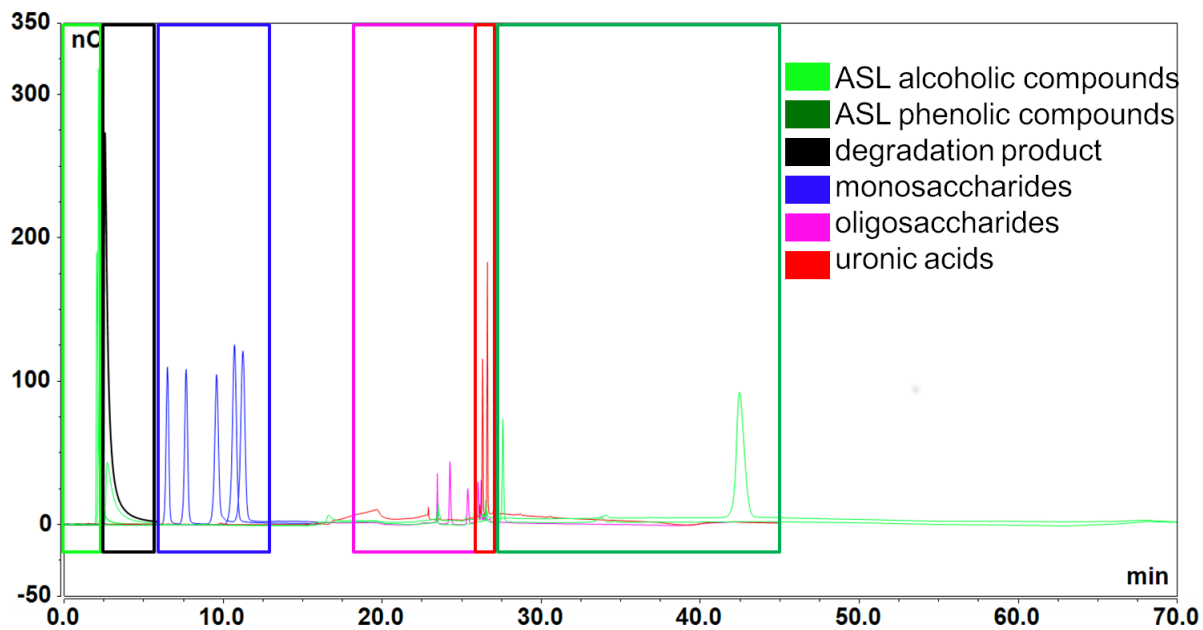

**Fig. S-1: Superposition of chromatograms of commercially available soluble biomass standards.** The green box shows the acid-soluble lignin (ASL) compounds, the black box the sugar degradation product 5-HMF, the blue box the monosaccharides, the pink box the soluble oligosaccharides and the red box the uronic acids.

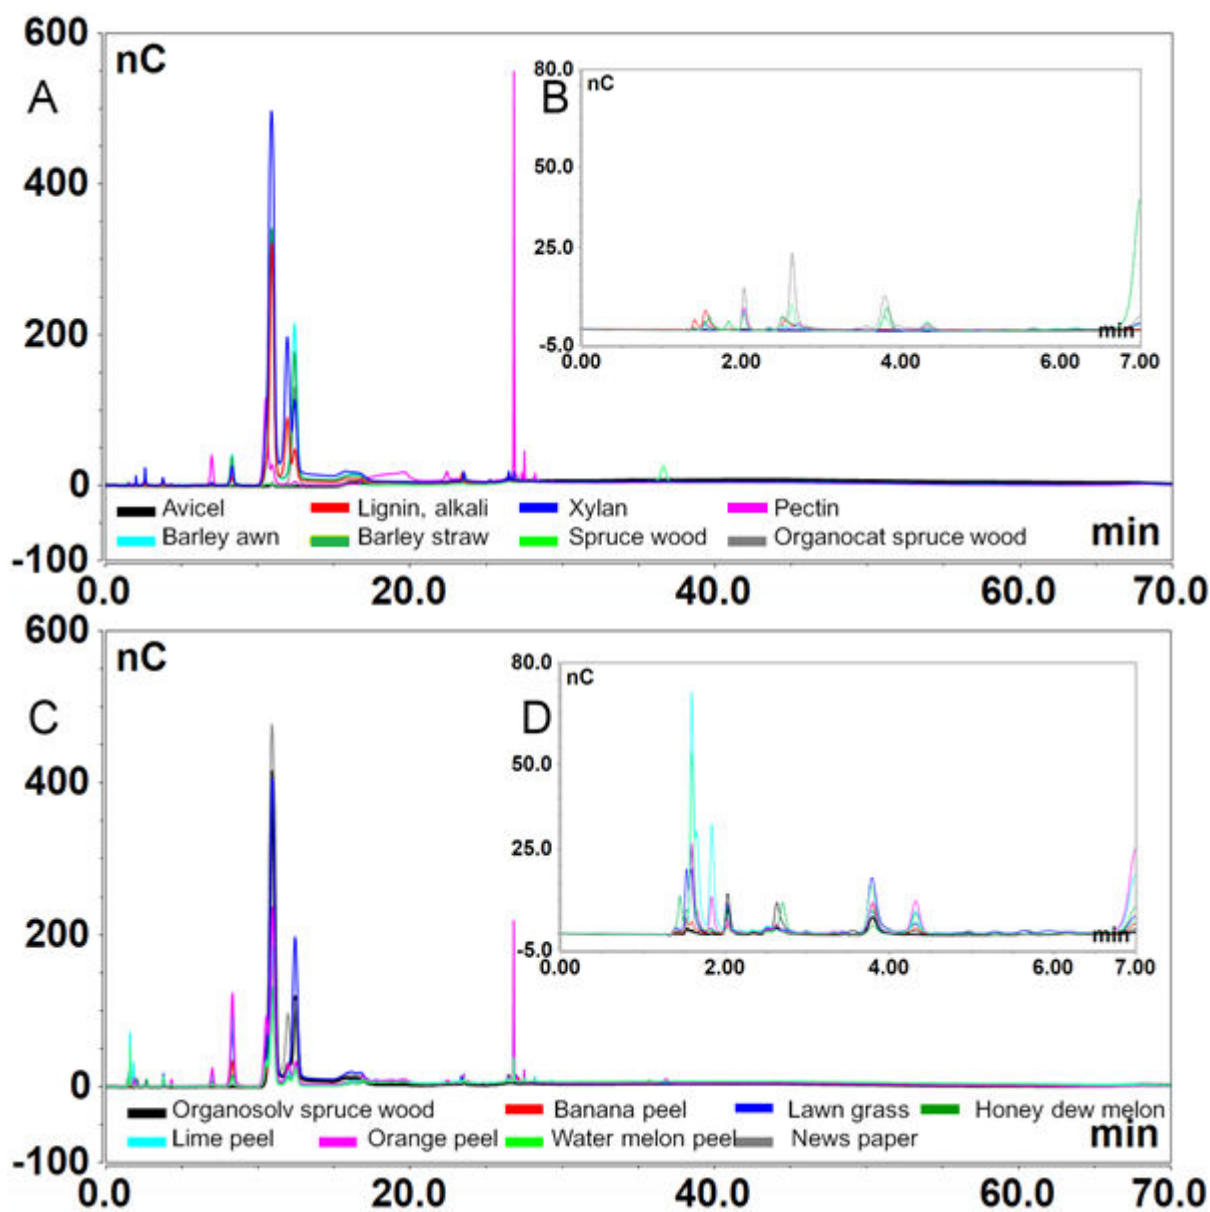

**Fig. S-2: Overlay of chromatograms from different hydrolyzates.** Diverse biomasses were hydrolyzed with a two-step acid hydrolysis. The obtained liquid was analyzed using the HPAEC-PAD method described here. A and C: full chromatogram. B and D: chromatograms of the biomass derived phenols.
